1 **An *in vitro* tumorigenesis model based on live cell-generated oxygen and nutrient gradients**

2 Anne C. Gilmore<sup>1§</sup>, Sarah J. Flaherty<sup>1</sup>, Veena Somasundaram<sup>2</sup>, David A. Scheiblin<sup>3</sup>, Stephen J.

3 Lockett<sup>3</sup>, David A. Wink<sup>2</sup>, William F. Heinz<sup>3\*</sup>

4

5 <sup>1</sup>Optical Microscopy and Analysis Laboratory, Office of Science and Technology Resources, Center

6 for Cancer Research, National Cancer Institute, National Institutes of Health

7 <sup>2</sup>Laboratory of Cancer Immunometabolism, Center for Cancer Research, National Cancer

8 Institute, National Institutes of Health

9 <sup>3</sup>Optical Microscopy and Analysis Laboratory, Cancer Research Technology Program, Frederick

10 National Laboratory for Cancer Research, Frederick, MD

11 <sup>§</sup>Current address: Graduate School of Biomedical Sciences, St. Jude Children's Research Hospital,

12 Memphis, TN.

13

14 *Running title:* Oxygen and nutrient gradient tumorigenesis model

15 *Keywords:* hypoxia, tumor microenvironment, live cell model

16 *\*Correspondence should be addressed to:*

17 William F. Heinz

18 Optical Microscopy and Analysis Laboratory

19 Frederick National Lab For Cancer Research

20 Leidos Biomedical Research, Inc.

21 P.O. Box B

22 Frederick, MD 21702

23 301-846-1239

24 Will.heinz@nih.gov

25

An *in vitro* tumorigenesis model based on live cell-generated oxygen and nutrient gradients. Gilmore, et al., 2020.

26 **The tumor microenvironment (TME) is multi-cellular, spatially heterogenous, and contains**  
27 **cell-generated gradients of soluble molecules. Current cell-based model systems lack this**  
28 **complexity or are difficult to interrogate microscopically. We present a 2D live-cell chamber**  
29 **that approximates the TME and demonstrate that breast cancer cells and macrophages**  
30 **generate hypoxic and nutrient gradients, self-organize, and have spatially varying phenotypes**  
31 **along the gradients, leading to new insights into tumorigenesis.**

32

33 Concentration gradients of soluble molecules in tissue are established by their release  
34 from and consumption by cells in combination with extracellular diffusion. These gradients  
35 influence the spatial organization and phenotypes of cells in solid tissues, including tumors<sup>1</sup>.

36 Current experimental tissue models do not capture the complex spatial organization of  
37 cells and molecules, and they can be difficult to interrogate microscopically. Standard 2D cell  
38 culture does not replicate long-range (> 100  $\mu\text{m}$ ) gradients of extracellular molecules within the  
39 TME. Microfluidic systems can impose diffusive gradients on 2D cell cultures and are designed  
40 for microscopic interrogation<sup>2,3</sup>, but they control only a limited number of molecules of  
41 interest, the spatial organization of cells is not the same as tissue, and the molecular gradients  
42 are not naturally cell driven. Although organoids and spheroids reflect to some extent the  
43 molecular gradients that arise in actual tissues, they vary in structure<sup>4</sup> and are challenging to  
44 examine and quantify at high spatial resolution with long term live-cell microscopy<sup>5</sup>.

45 Hypoxic gradients in 2D cell culture were observed in 2018 in restricted exchange  
46 environment chambers (REECs)<sup>6</sup>. Cells in this chamber, supported on a standard #1.5 glass  
47 coverslip (0.17 mm thick), grow in a small (< 20  $\mu\text{L}$ ) lower compartment separated from a larger

An *in vitro* tumorigenesis model based on live cell-generated oxygen and nutrient gradients. Gilmore, et al., 2020.

48 upper compartment (~ 1 mL) by a coverslip with a small central hole (~0.7 mm diameter)  
49 through which O<sub>2</sub> and soluble molecules (e.g., nutrients, cytokines, and cellular waste products)  
50 diffuse between the compartments (Fig. 1a). Thus, cells directly beneath the hole are exposed  
51 to O<sub>2</sub> and nutrients at the concentration of the upper compartment, while cells distal to the  
52 hole exist in a cell-generated hypoxic environment.

53 Here we report the application of the chamber to investigate the TME. Specifically, we  
54 examine the role of O<sub>2</sub> and nutrient gradients on tumor and immune cell phenotype, using 4T1  
55 mouse mammary tumor cells and ANA-1 mouse macrophages as exemplars. The 4T1 model  
56 shares many features with triple negative human breast cancer<sup>7</sup>, and macrophages are the  
57 most abundant non-cancer cells in the TME and play an immunosuppressive role in  
58 tumorigenesis<sup>8</sup>. These cells types were cultured separately and in co-culture in the chamber,  
59 and the spatiotemporal dynamics of O<sub>2</sub> gradient formation, nutrient uptake, cell migration and  
60 cell survival were quantified.

## 61 Results

62 GFP-tagged 4T1 cells, initially uniformly distributed (~75% confluence) in the lower  
63 compartment, began migrating towards the hole within 36 h and formed a stable disk with a  
64 diameter of ~1 mm within ~60 h (Fig. 1b, Supplemental Video 1). Beyond the disk, cells  
65 detached from the bottom of the well and died (Supplementary Fig. 1), analogous to necrotic  
66 zones in solid tumors. The resulting 4T1-disk remained alive and stable for at least three weeks  
67 with periodic changes to media in the upper compartment. We attribute the directed motion of  
68 cells to O<sub>2</sub> gradients within the chamber, which do not arise in standard cell culture and cannot  
69 be readily observed in intact tumors or 3D cell culture models. 4T1 proliferation recovers with

An *in vitro* tumorigenesis model based on live cell-generated oxygen and nutrient gradients. Gilmore, et al., 2020.

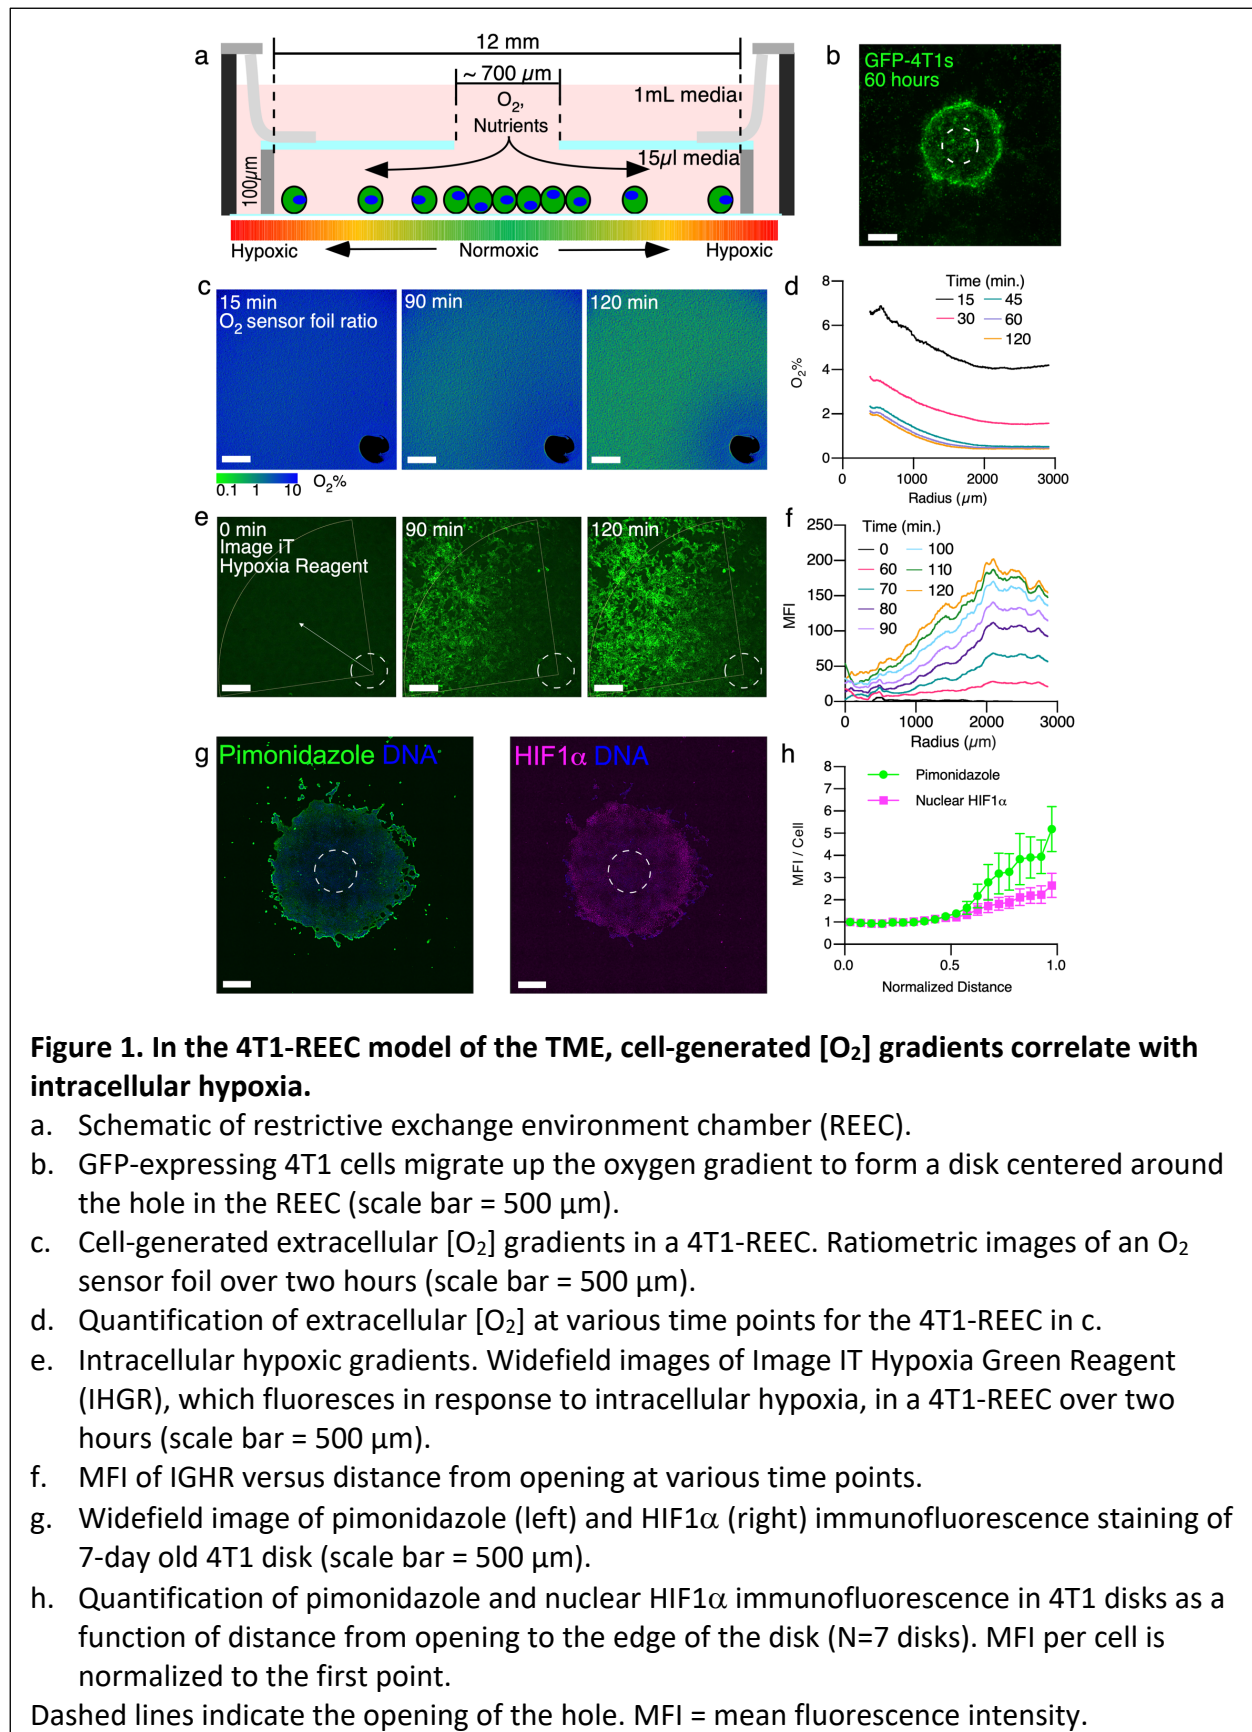



An *in vitro* tumorigenesis model based on live cell-generated oxygen and nutrient gradients. Gilmore, et al., 2020.

71 disk expansion after the chamber is removed (Supplemental Fig. 2) and normoxia is  
72 reestablished. Interestingly, this experiment showed that 4T1 cells could respond to the  
73 gradient of O<sub>2</sub> by converting to a migratory phenotype in order to coalesce near the opening in  
74 the chamber. This behavior is characteristic of tumor cells *in vivo* and was shown here to be  
75 possible without the presence of other cell types, extracellular matrix, or 3D environment.

76 After demonstrating that REECs reproduce tumor behavior, we quantitatively  
77 characterized the hypoxia and nutrient gradients, and how these gradients affected 4T1  
78 phenotype and metabolism. Dissolved extracellular O<sub>2</sub> concentration ([O<sub>2</sub>]) measurements in  
79 the REECs showed that stable radial negative gradients formed rapidly (< 2 h) after chamber  
80 placement onto uniformly distributed 4T1 cells in 2D cell culture (Fig. 1c, d; Supplemental Fig.  
81 3), which agreed with mathematical modeling (Supplemental Fig. 4). Fluorescence labeling of  
82 the live 4T1 cells with the image-iT green hypoxia reagent (IGHR) revealed that positive  
83 gradients of intracellular hypoxia formed in a similar timescale, and the hypoxic front (the  
84 distance at which the IGHR signal is 90% of its maximum) was within a millimeter of the edge of  
85 the opening after 2 h (Fig. 1e, f).

86 Hypoxia, through hypoxia inducible factor (HIF1 $\alpha$ ) stabilization, can induce pro-tumor  
87 phenotypes (Supplemental Fig. 5), including a collective-to-amoeboid transition, increased in  
88 vimentin expression, and migration of 4T1 cells<sup>9</sup>. Cells in the periphery of the disks exhibit a  
89 temporary increase in vimentin expression relative to E-cadherin expression, between 12 and  
90 36 hours after initiation, suggesting a transient phenotypic shift to a mesenchymal state  
91 (Supplemental Fig. 6)<sup>10</sup>. In stable disks, increased cellular hypoxia distal to the hole was  
92 measured by pimonidazole reduction and HIF1 $\alpha$  localization to the nuclei (Fig. 1g, h).

An *in vitro* tumorigenesis model based on live cell-generated oxygen and nutrient gradients. Gilmore, et al., 2020.

93 During initial O<sub>2</sub> gradient formation (< 2 h) glucose consumption exhibited a radial  
94 gradient with maximum consumption at the opening at early time points (Fig. 2a, b;). However,  
95 no gradient of mitochondrial membrane potential ( $\Delta\Psi_m$ ) was observed via  
96 tetramethylrhodamine-ethyl-ester (TMRE) fluorescence 2 hours after chamber placement,  
97 suggesting that oxidative phosphorylation continues for some time after hypoxia is established.  
98 In fully formed disks (> 72 h),  $\Delta\Psi_m$  decreased while glucose consumption increased with radial  
99 distance (Fig. 2c, d, Supplemental Fig. 7), consistent with a metabolic shift from oxidative  
100 phosphorylation to glycolysis in the hypoxic region. Mathematical modeling predicted no

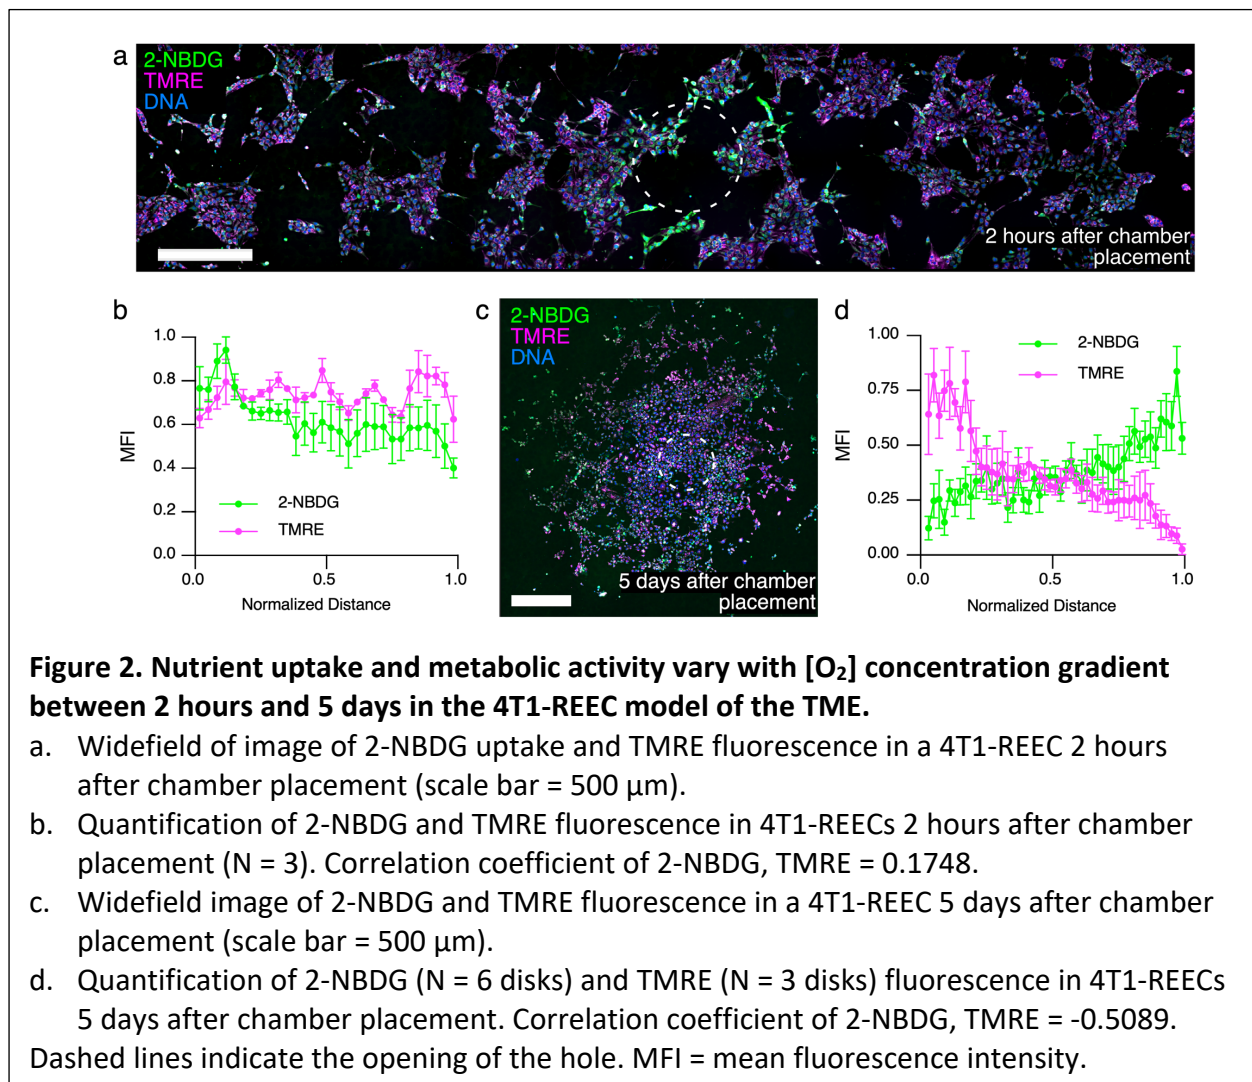

An *in vitro* tumorigenesis model based on live cell-generated oxygen and nutrient gradients. Gilmore, et al., 2020.

101 significant gradient of glucose in the media away from the standard serum glucose  
102 concentration (22.5 mM), which is far in excess of the metabolic needs of the cells  
103 (Supplemental Fig. 4). Thus, we conclude the [O<sub>2</sub>] gradient alone drove the metabolic shift.  
104 These results demonstrate that REECs capture key features of hypoxia and metabolism in 4T1  
105 tumorigenesis.

106 We utilized REECs to further understand the immunosuppressive role of the  
107 inflammatory proteins inducible nitric oxide synthase (Nos2) and cyclooxygenase-2 (Cox2) in  
108 the tumorigenic microenvironment. Clinically, high expression of both these proteins in ER-  
109 human breast cancer is an indicator of very poor prognosis<sup>11</sup>; both are potential targets for  
110 therapy using FDA-approved anti-inflammatory drugs in combination with standard treatments.  
111 Nos2 produces nitric oxide (NO), a key regulator of cancer processes<sup>12</sup>, from L-arginine and is  
112 upregulated by stabilized HIF1 $\alpha$  in response to hypoxia and nutrient deprivation<sup>13</sup>  
113 (Supplemental Fig. 5). Therefore, we postulated that in the hypoxic regions of fully formed  
114 disks, the Nos2 expression and NO flux would be high relative to Cox2-expression. We observed  
115 Nos2 levels remain high relative to Cox2 in the hypoxic regions of disks, spheroids, and tissue  
116 (Fig. 3a, b, Supplemental 8). We also saw a large increase in NO flux in the hypoxic regions of  
117 4T1-disks, confirming our hypothesis (Figure 4a-d, control disks; Supplemental 8).

118 We observed in disks, spheroids, and tumor tissue that different 4T1 cells expressed  
119 high levels of Nos2 or Cox2 and that high Nos2-expressing cells tended to be clustered together  
120 (Fig. 3b, Supplemental Fig. 9) under hypoxia-induced stress conditions. The fact that Nos2 and  
121 Cox2 are highly expressed in different cells indicates that these proteins likely drive the  
122 expression and activity of each other via an intercellular feed-forward mechanism<sup>14</sup> mediated

An *in vitro* tumorigenesis model based on live cell-generated oxygen and nutrient gradients. Gilmore, et al., 2020.

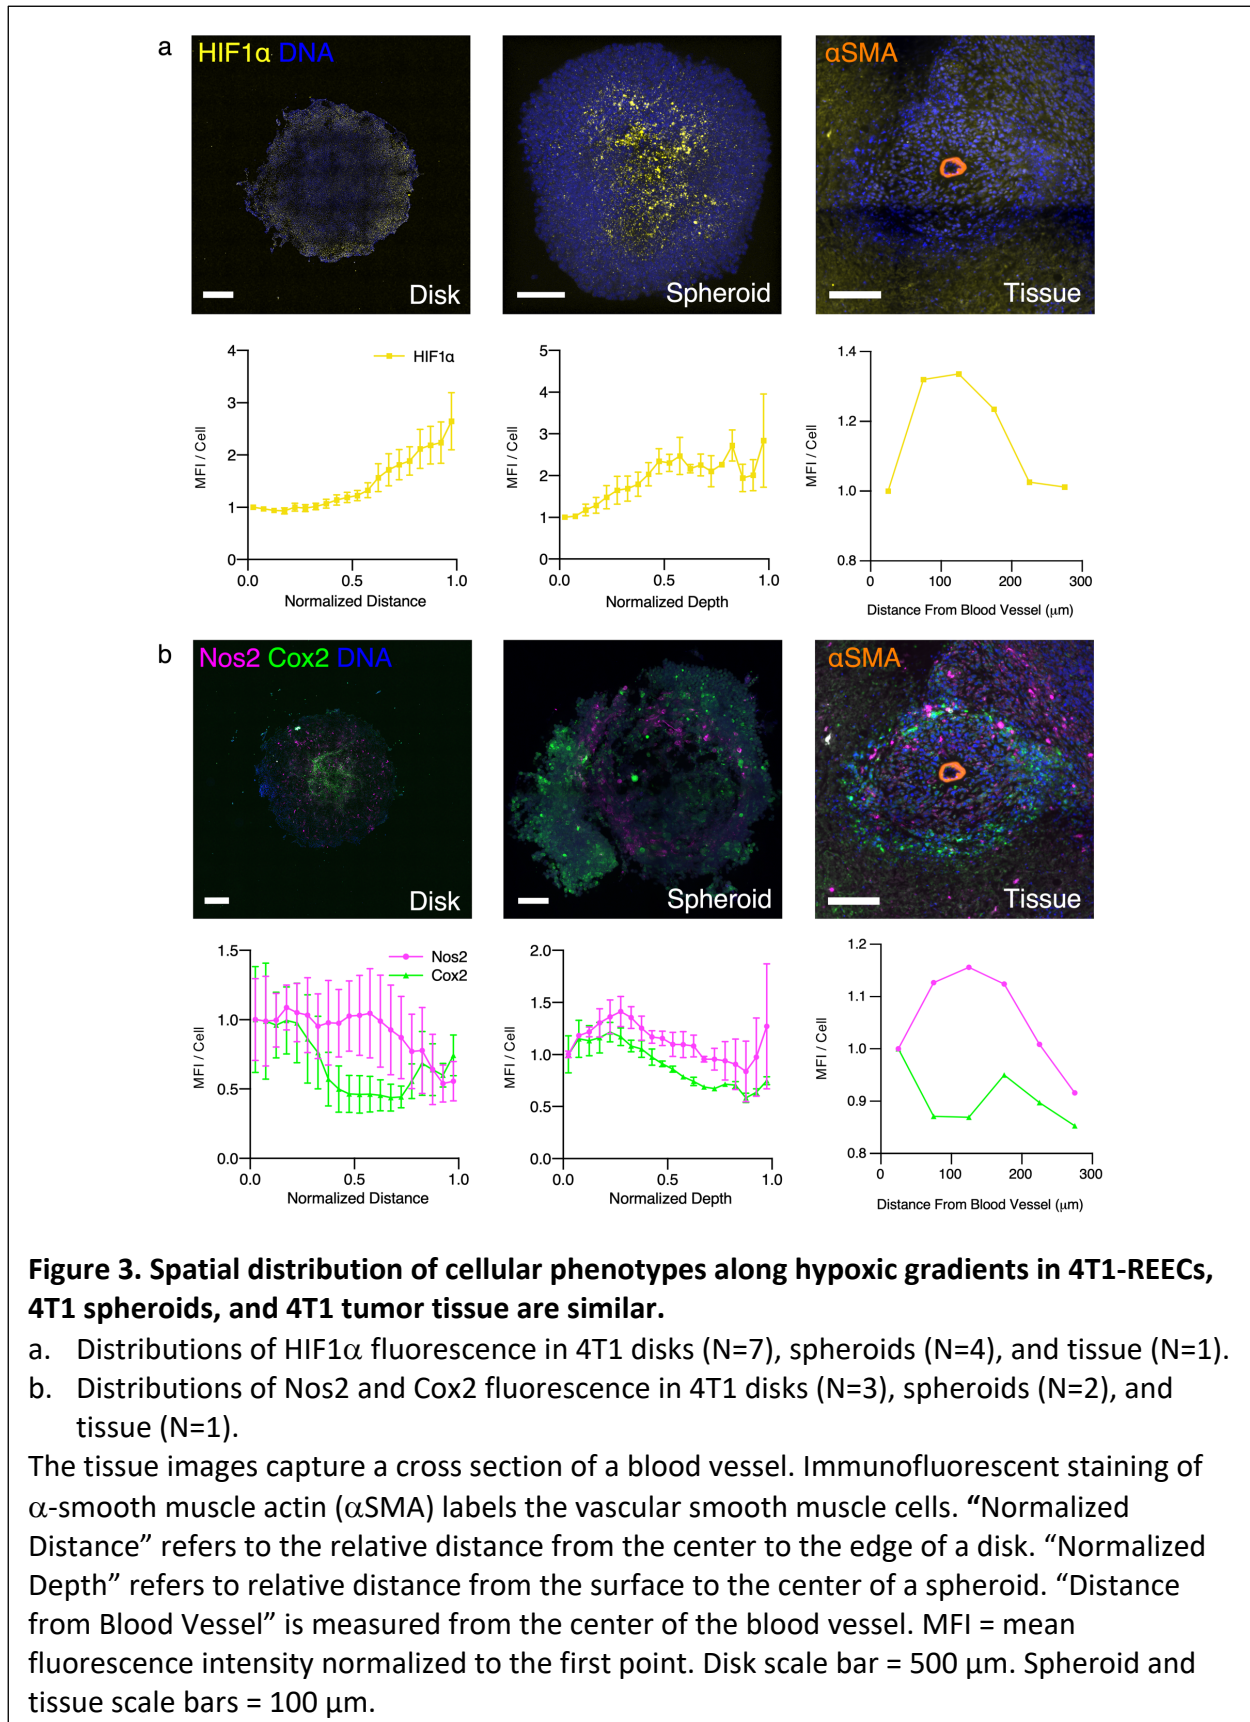

An *in vitro* tumorigenesis model based on live cell-generated oxygen and nutrient gradients. Gilmore, et al., 2020.

124 by the release of NO and PGE2 from the cells<sup>11</sup>. Nos2-expressing cell clumps likely lead to  
125 significantly higher local concentrations of NO than could arise when Nos2-expressing cells are  
126 scattered and isolated<sup>15</sup> and thus augment this paracrine mechanism.

127 Inhibitors of Nos2 and Cox2 interrupt the feed-forward loop and reduce tumor growth  
128 rate<sup>11, 13</sup>. We therefore treated 4T1 disks in REECs with Nos2 or Cox2 inhibitors for 7 days to  
129 examine the effect of the inhibitors on the distribution of protein expression, NO release,  
130  $\Delta\Psi_m$ , and mitochondrial mass within the disks (Fig. 4a-d).

131 Treatment with the Nos2 inhibitor aminoguanidine (AG, 1 mM) resulted in a large  
132 compensatory increase in Nos2 expression in the more hypoxic regions of the disk versus the  
133 untreated control, minimal NO levels, as well as increased Cox2 expression in the more  
134 normoxic regions of the disk. Treatment with the Cox inhibitor indomethacin (Indo, 100  $\mu$ M)  
135 likewise resulted in a compensatory increase in Cox2 expression in hypoxic regions of the disk  
136 and increased Nos2 expression and NO levels across the disk relative to control. Interestingly,  
137 nuclear HIF1 $\alpha$  levels were lower in the hypoxic regions of Indo-treated disks relative to the  
138 controls (Fig. 4a, b). Given that NO flux increases in the hypoxic region with indomethacin  
139 treatment (Fig. 4c, d), this is most likely due to the known inhibitory effect of NO on HIF1 $\alpha$  in  
140 hypoxic conditions<sup>16</sup>.

141  $\Delta\Psi_m$  was higher in more normoxic regions compared to hypoxic regions for both  
142 treatments and controls, as expected (Fig. 4c, d). Relative to controls,  $\Delta\Psi_m$  was lower in Indo-  
143 treated disks, indicating decreased mitochondrial activity in response to the higher levels of NO  
144 across the disk, as expected.  $\Delta\Psi_m$  was higher in AG treated disks, particularly in the hypoxic  
145 regions, indicating a failure to switch to anaerobic metabolism in absence of functional Nos2.



An *in vitro* tumorigenesis model based on live cell-generated oxygen and nutrient gradients. Gilmore, et al., 2020.

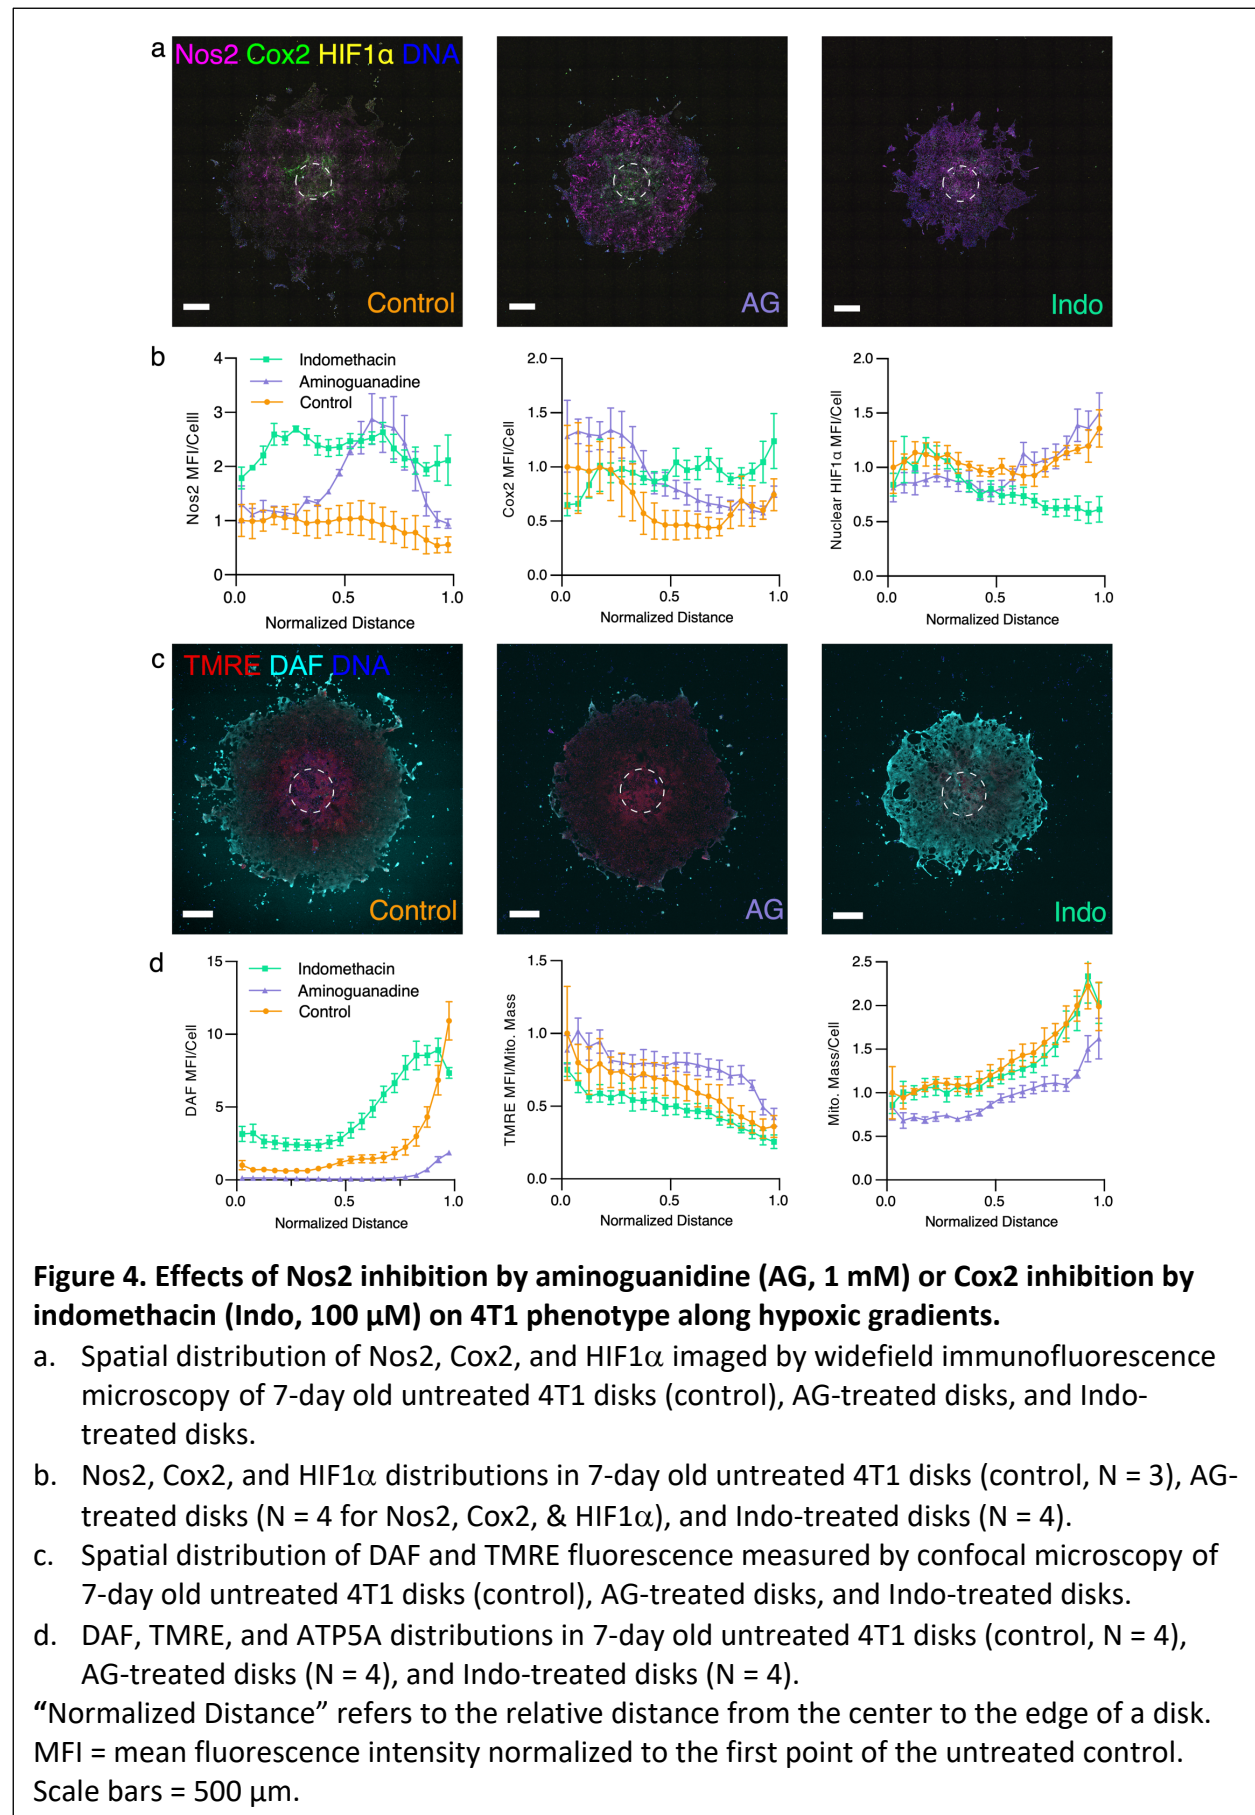

An *in vitro* tumorigenesis model based on live cell-generated oxygen and nutrient gradients. Gilmore, et al., 2020.

147 Additionally, mitochondrial mass was lower in the AG treated disks (Fig. 4d), likely due to the  
148 lack of NO, which plays an important role in mitochondrial biogenesis<sup>17</sup>. Indo-treated 4T1 disks  
149 contained fewer cells than control disks, mirroring effects of the anti-inflammatories in tumors  
150 (Supplementary Fig. 10)<sup>12,13</sup>. These results show that anti-inflammatory compounds modulate  
151 cellular phenotypes along the hypoxic gradient, which demonstrates the utility of the 4T1-REEC  
152 system for understanding treatment mechanisms in conjunction with hypoxia in the TME.

153         Macrophages localize to areas of hypoxia and necrosis in the TME where they play an  
154 immunosuppressive role<sup>18</sup>. Therefore, we cultured ANA-1 macrophages in the REEC either  
155 alone or with 4T1 cells. The macrophages, unlike 4T1 cells did not migrate towards the opening  
156 or form disks, though they did generate a hypoxic gradient as observed via IGHR staining  
157 (Supplemental Fig. 11). Macrophages treated with the pro-inflammatory cytokines IFN $\gamma$  and LPS  
158 express higher levels of Nos2 and thus produce more NO, which converts them to a glycolytic  
159 pathway and decreases their mitochondrial metabolism and O<sub>2</sub> consumption<sup>15</sup>. This effect was  
160 observed in REECs as the hypoxic front of treated macrophages was further from the hole than  
161 that of untreated cells (Supplemental Fig. 11). When macrophages were co-cultured with 4T1s  
162 or injected through the hole onto stable 4T1 disks, the macrophages populated the hypoxic and  
163 4T1-necrotic regions (Supplemental Fig. 11). These results are consistent with macrophage  
164 behavior in spheroids and *in vivo* in which IFN $\gamma$ +LPS stimulated macrophages infiltrate the  
165 hypoxic core of spheroids (Supplemental Fig. 12) and hypoxic regions of tumors<sup>19</sup>. Interestingly,  
166 the area of stable 4T1 disks decreased following the injection of unstimulated macrophages.  
167 Injection of stimulated macrophages or fresh media resulted in increases in 4T1 disk area  
168 (Supplemental Figure 11). This suggests that the stimulated macrophage-generated increase in



An *in vitro* tumorigenesis model based on live cell-generated oxygen and nutrient gradients. Gilmore, et al., 2020.

169 extracellular NO in the chamber drives glycolysis and reduces the O<sub>2</sub> consumption of the 4T1  
170 and ANA1 cells enough to push back the hypoxic front, thereby promoting survival and  
171 proliferation of the tumor cells.

172 In conclusion, we demonstrated that the 4T1/ANA1-REEC *in vitro* model captures key  
173 features of the tumorigenic microenvironment. It recapitulates the cell-generated oxygen  
174 gradients that exist in solid tumors and via live-cell microscopy can reveal cell dynamics and  
175 phenotypes that cannot be readily determined from actual tumors. Hence, the REEC system is a  
176 powerful tool to investigate mechanisms of tumorigenesis, immunotherapy, and anti-  
177 inflammatory treatments in live cells in a tumor-like environment.

An *in vitro* tumorigenesis model based on live cell-generated oxygen and nutrient gradients. Gilmore, et al., 2020.

## 178 Methods

### 179 REEC design and assembly

180 The REECs design was modified to improve functionality and fit 12-well glass-bottom plates  
181 (Figure 1A). For each REEC, a through hole (~700  $\mu\text{m}$  diameter) was manually machined into a  
182 circular cover glass (18 mm diameter) using a high-speed air drill and tapered carbide bit (SCM  
183 Systems, Inc, Menomonee Falls, WI). A stainless-steel O-ring (0.100 mm thick, 12 mm ID, 18 mm  
184 OD) was epoxied to one side of the cover glass using UV-curable epoxy (Norland Products, Inc.).  
185 Laser-machined mylar clamps were epoxied to the other side of the cover glass using the same  
186 epoxy. Between each step, the epoxy was cured for 5 minutes in a UV-Ozone cleaner (Model  
187 342, Jelight). Chambers were UV-sterilized immediately prior to use in cell culture  
188 (Supplemental Protocol).

189

190 The stainless-steel O-ring has a smoother, more uniform contact surface compared to the  
191 laser-machined Mylar gasket that was used in previously published studies. The epoxy layer  
192 between the steel spacer and the cover glass adds approximately 40  $\mu\text{m}$  to the height of the  
193 chamber. Average chamber height was 138.4  $\mu\text{m}$  +/- 12.1  $\mu\text{m}$ , and the interior volume was  
194 approximately 15.65  $\mu\text{L}$ . The average hole diameter was 740.1 +/- 125.1  $\mu\text{m}$ .

195

### 196 Cell culture and plating for the REEC/4T1 system

197 Murine mammary triple negative breast cancer 4T1 cells were cultured in complete media  
198 (DMEM media, 25 mM glucose, 10% fetal bovine serum (FBS), penicillin, and streptomycin;

An *in vitro* tumorigenesis model based on live cell-generated oxygen and nutrient gradients. Gilmore, et al., 2020.

199 Quality Biologicals). GFP-expressing 4T1 cells, 4T1-Fluc-Neo/eGFP-Puro cells (GFP-4T1, Imanis  
200 Life Sciences), were grown in complete media and selected for using G418 and puromycin. Prior  
201 to plating, laser-machined Mylar rims were epoxied on to a 12 well-plate. The Mylar rims  
202 ensure that the Mylar clamps of each REEC are able to firmly hold the REEC against the bottom  
203 of the well. 4T1 cells were then plated (200,000 cells/mL, 1 mL/well) and incubated at 37°C.  
204 Once the 4T1 cells reached 70-80% confluency (~24 hours), the media was refreshed and REECs  
205 were placed with sterilized forceps and pressed firmly to the bottom of the well. Media in the  
206 upper chamber was refreshed every 3-4 days with the least possible disturbance to the lower  
207 chamber possible.

208

## 209 **Mathematical model**

210 The REEC/4T1 system was simulated as an annulus containing a uniform density of consumers  
211 and used a diffusion-consumption model<sup>20</sup> to characterize the time-evolution and steady state  
212 behavior of oxygen and glucose. For a radially symmetric system, the concentration (C) of a  
213 molecular species is described by

$$214 \quad \frac{\partial C}{\partial t} = \frac{1}{r} \frac{\partial}{\partial r} \left( rD \frac{\partial C}{\partial r} \right) - n_{consumers} k_{consumption} f(C)$$

215 Where  $n$  = concentration of consumers,  $k$  = the per-cell consumption rate, and  $f(C)$  is a function  
216 of concentration and can be written as

$$217 \quad f(C) = C_{bulk} \frac{1}{1 + \frac{C_{bulk}}{C}}$$

218 At steady state, a characteristic distance can be defined as

An *in vitro* tumorigenesis model based on live cell-generated oxygen and nutrient gradients. Gilmore, et al., 2020.

219 
$$\lambda = \sqrt{\frac{D}{n \cdot k}}$$

220  $k$ , can be calculated from the maximum per cell molecular consumption rate,  $A_{max}$ , and the  
221 concentration of the molecule of interest,  $C_{bulk}$

222 
$$A_{max} = kC_{bulk}$$

223

224 MATLAB's partial differential equation toolbox was used to model the evolution of  
225 oxygen and glucose gradients within the REEC/4T1 system at 37 °C. The system was defined as  
226 an annulus with an inner radius,  $r_1$ , of 350  $\mu\text{m}$  and an outer radius,  $r_2$ , of 6,000  $\mu\text{m}$ ,  
227 corresponding to the radius of the REEC opening and the inner radius of the REEC, respectively.  
228 The inner radius was modeled as a source of the diffusing molecules with a constant  
229 concentration,  $C_{bulk}$ .

230 Thus, the boundary conditions were

231 
$$C(r_1, t) = C_{bulk}$$

232 
$$\frac{\partial C(r_2, t)}{\partial r} = 0$$

233 The initial condition corresponded to the moment the chamber was placed in the well:

234 
$$C(r, 0) = C_{bulk}$$

235 Oxygen diffusion, glucose diffusion, and glucose consumption rate values for 4T1 cells were  
236 based on the literature<sup>23-27</sup>. Oxygen consumption rate (OCR) was measured directly via a  
237 Seahorse XF96 metabolic analyzer (see below).

238

239

An *in vitro* tumorigenesis model based on live cell-generated oxygen and nutrient gradients. Gilmore, et al., 2020.

240 Table 1.

| Parameter                              | Value                                    | Reference                                                      |
|----------------------------------------|------------------------------------------|----------------------------------------------------------------|
| D ( $\mu\text{m}^2/\text{s}$ )         |                                          |                                                                |
| O <sub>2</sub>                         | 3,370                                    | <sup>21</sup>                                                  |
| Glucose                                | 616                                      | <sup>22</sup>                                                  |
| A <sub>max</sub><br>(molecules/cell/s) |                                          |                                                                |
| O <sub>2</sub>                         | $2.98 \times 10^7$                       | OCR measured with Seahorse XF mito-stress test with 4T1 cells. |
| Glucose                                | $6.47 \times 10^7$                       | <sup>23</sup>                                                  |
| C <sub>bulk</sub>                      |                                          |                                                                |
| O <sub>2</sub>                         | 178 $\mu\text{M}$ ,<br>171 $\mu\text{M}$ | <sup>24, 25</sup>                                              |
| Glucose                                | 25 mM                                    | DMEM media specification (Quality Biologicals)                 |

241

242 The oxygen concentration used in the dynamic model at  $r < 350 \mu\text{m}$  is 171  $\mu\text{M}$ , not 178  $\mu\text{M}$   
 243 which is the value at the interface of the media and the atmosphere. It is somewhat less  
 244 because the cells immediately below the opening in the REEC consume the oxygen diffusing  
 245 through the opening in the coverglass. To account for this, we modeled the oxygen  
 246 concentration in a column of media 250  $\mu\text{m}$  tall (100  $\mu\text{m}$  high REEC and a 150  $\mu\text{m}$  thick  
 247 coverglass) above a monolayer of 4T1 cells using a model based on Fick's law<sup>25</sup>. At the top of  
 248 the column, the media above the REEC coverglass is assumed to be fully oxygenated (178  $\mu\text{M}$ ).  
 249 Using a 4T1 density was 200,000 cells/cm<sup>2</sup> and the A<sub>max</sub> for the 4T1s, the O<sub>2</sub> concentration at  
 250 the cell layer was calculated to be 171  $\mu\text{M}$ .

251

252 For each molecular species, the simulation was run for an equivalent of 48 hours for each  
 253 combination of maximum cellular molecular consumption rate, A<sub>max</sub>, and cell density,  $n$ .

An *in vitro* tumorigenesis model based on live cell-generated oxygen and nutrient gradients. Gilmore, et al., 2020.

254 Convergence to steady state was defined as a change in RMS difference of less than 0.1 %  
255 between successive profiles.

256

### 257 **Oxygen consumption rate measurements**

258 4T1 cells' OCR was measured using the XF96 Seahorse Metabolic Analyzer (Agilent  
259 Technologies, California). 4T1s were plated ( $1 \times 10^5$  cells) in each well (200  $\mu$ L) of a Seahorse  
260 microplate. The plates were then incubated at 37°C for 2 hours to allow time for the 4T1 cells  
261 to adhere. Mitochondrial stress tests were performed per manufacturer's instructions. The OCR  
262 was measured as cells were treated sequentially with oligomycin (inhibitor of complex V in the  
263 electron transport chain (ETC)), trifluoromethoxy carbonylcyanide phenylhydrazone (FCCP,  
264 Sigma-Aldrich, a depolarizer of the mitochondrial membrane potential), and rotenone and  
265 antimycin-A (inhibitors of complex I and III in the ETC, respectively). Basal respiration, ATP-  
266 linked respiration, and spare capacity were calculated using the Seahorse software.

267

### 268 **4T1 mouse mammary tumor model**

269 The NCI-Frederick Animal Facility, accredited by the Association for Accreditation of Laboratory  
270 Animal Care International, follows the Public Health Service Policy for the Care and Use of  
271 Laboratory Animals. Animal care was provided in accordance with the procedures outlined in  
272 the Guide for Care and Use of Laboratory Animals. Protocols for *in vivo* studies were approved  
273 by the Frederick Animal Care and Use Committee (ACUC). Female BALB/c mice obtained from  
274 the Frederick Cancer Research and Development Center Animal Production Area were housed  
275 five per cage. Eight to ten-week-old female BALB/c mice were subcutaneously injected with

An *in vitro* tumorigenesis model based on live cell-generated oxygen and nutrient gradients. Gilmore, et al., 2020.

276  $2 \times 10^5$  4T1 cells. The allograft tumor volume was measured by Vernier caliper and calculated  
277 as volume ( $\text{mm}^3$ ) = (width<sup>2</sup> × length)/2. When the tumors reached 2000  $\text{mm}^3$ , typically 30 days  
278 post injection, the mice were euthanized, tumors were collected for analysis. Tumors were flash  
279 frozen in liquid nitrogen and the tissues were cut into 10  $\mu\text{m}$  thick sections by the  
280 Pathology/Histotechnology Laboratory at NCI – Frederick.

281

## 282 **Fixation**

283 4T1 cells cultured in 12-well plates were fixed in 4% v/v paraformaldehyde for 15 minutes.  
284 Samples were rinsed three times in PBS and then blocked and permeabilized in blocking buffer  
285 (3% BSA w/v, 0.3% Triton-X100 in 1X DPBS) for 1 hour.

286

287 Fresh frozen sections of 4T1 tumors were fixed in 4% v/v paraformaldehyde for 30 minutes.  
288 Samples were rinsed three times in PBS and then blocked and permeabilized in blocking buffer  
289 for 1.5 hours.

290

## 291 **Immunofluorescence Staining**

292 After being fixed, blocked, and permeabilized, cultured 4T1 cells were stained with antibodies  
293 diluted in blocking buffer. Incubation times, temperatures, dilutions, and secondaries (if  
294 necessary) were used as described in Table 2. For overnight incubations, the samples were kept  
295 in a humidified chamber. Cells were then washed three times with 1X PBS and stained with  
296 DAPI (300nM; ThermoFisher Scientific) for 15 minutes in 1X PBS. Cells were rinsed an additional  
297 three times with 1X PBS prior to storage or imaging.



An *in vitro* tumorigenesis model based on live cell-generated oxygen and nutrient gradients. Gilmore, et al., 2020.

298

299 After being fixed, blocked, and permeabilized, fresh frozen sections of 4T1 tumors were stained

300 overnight at 4°C with antibodies diluted in blocking buffer, as described in Table 2. Samples

301 were rinsed three times with PBS, stained with DAPI (300nM) for 30 minutes, rinsed again, and

302 sealed for imaging on the Nikon Eclipse Ti widefield fluorescence microscope.

303

304 Table 2:

| <b>Antibody &amp; fluorophore</b>                                         | <b>Clone</b> | <b>Vendor – Catalog number</b>       | <b>Host</b> | <b>Dilution</b> | <b>Time</b> | <b>Temp.</b> |
|---------------------------------------------------------------------------|--------------|--------------------------------------|-------------|-----------------|-------------|--------------|
| E-cadherin, direct conjugate (AlexaFluor-488)                             | 24E10        | Cell Signaling Technologies – 3199S  | Rabbit      | 1:100           | O/N         | 4°C          |
| Vimentin, direct conjugate (AlexaFluor-555)                               | D21H3        | Cell Signaling Technologies – 9855S  | Rabbit      | 1:50            | O/N         | 4°C          |
| DAPI                                                                      | NA           | ThermoFisher                         | NA          | 1:1000          | 15 min      | RT           |
| Nos2, direct conjugate (AlexaFluor-568)                                   | EPR16635     | AbCam – 209595                       | Rabbit      | 1:100           | 1 h or O/N  | RT or 4°C    |
| Cox2, direct conjugate (AlexaFluor-488)                                   | D5H5         | Cell Signaling Technologies – 13596S | Rabbit      | 1:100           | 1 h or O/N  | RT or 4°C    |
| HIF1 $\alpha$ , direct conjugate (AlexaFluor-647)                         | EPR16897     | AbCam – 208420                       | Rabbit      | 1:100           | O/N         | 4°C          |
| ATP5A1 (Mitochondrial ATPase, Primary)                                    | NA           | AbClonal – A5884                     | Rabbit      | 1:100           | O/N         | 4°C          |
| (Anti-rabbit CF-640R secondary for ATPase)                                | NA           | Biotium – 20178                      | Donkey      | 1:100           | O/N         | 4°C          |
| $\alpha$ -Smooth Muscle Actin, direct conjugate (eFluor-488), eBioscience | 1A4          | ThermoFisher - 41-9760-82            | Mouse       | 1:400           | O/N         | 4°C          |

An *in vitro* tumorigenesis model based on live cell-generated oxygen and nutrient gradients. Gilmore, et al., 2020.

305

### 306 **Multiplexed Immunofluorescence**

307 After imaging with appropriate filter sets for the directly conjugated antibodies, cell and tissue  
308 samples were quenched<sup>26, 27</sup> using a solution comprised of 1 part hydrogen peroxide, 1 part  
309 sodium bicarbonate (pH 10) and 3 parts water for 15 minutes at room temperature. Samples  
310 were then washed three times with 1X PBS and imaged to ensure quenching. Samples were re-  
311 blocked with blocking buffer as described above and re-stained with a new set of directly  
312 conjugated antibodies. The quenching cycle can be repeated for at least four rounds of staining  
313 without noted damage. DAPI does not quench and can be used to register images for  
314 processing. Imaging was performed on the Nikon Eclipse Ti widefield fluorescence microscope.

315

### 316 **Stimulation of ANA-1 macrophages**

317 Murine ANA-1 macrophage cell line was established by infection of normal bone marrow from  
318 C57BL/6 mice with J2 recombinant virus<sup>28, 29</sup>. They were cultured in complete media. ANA-1s  
319 were stimulated via treatment with IFN $\gamma$  (100 U/mL) and LPS (20 ng/mL) for 18 to 24 hours. The  
320 media was then removed and replaced with fresh stimulation media and subsequent  
321 experiments were performed immediately.

322

### 323 **ANA-1 injection into 4T1 REECs**

324 In order to allow time for disks to form, REECs were placed on a 70-80% confluent monolayer of  
325 4T1-GFP-luc cells, using the method described above, 3 days prior to ANA-1 injection. ANA-1  
326 cells were stimulated with IFN $\gamma$  and LPS, as described above, 1 day prior to ANA-1 injection. On

An *in vitro* tumorigenesis model based on live cell-generated oxygen and nutrient gradients. Gilmore, et al., 2020.

327 the day of ANA-1 injection, ANA-1 cells were incubated in serum-free media with CellTracker  
328 Red CMTPX Dye (5  $\mu$ M, ThermoFisher) for at 37 °C for 30 minutes. The ANA-1 cells were then  
329 spun down and diluted in complete media (+/- IFN $\gamma$  and LPS) to ~10,000,000 cells/mL.  
330 Immediately prior to injection, the media in the upper chamber of the REECs was refreshed  
331 with complete media (+/- IFN $\gamma$  and LPS). The concentrated ANA-1 solution (10  $\mu$ L, containing  
332 ~100,000 ANA-1 cells) was injected through the opening, directly into the lower chamber of the  
333 REEC. For controls, complete media (10  $\mu$ L, +/- IFN $\gamma$  and LPS) containing no ANA-1 cells was  
334 injected instead. Images were taken every 2 hours for 48 hours on the Nikon Eclipse Ti widefield  
335 fluorescence microscope with a 4X dry objective and using a live cell heated stage.

336

### 337 **Extracellular O<sub>2</sub> concentration quantification in REECs via O<sub>2</sub> sensor foils**

338 To quantify the spatial variation of dissolved [O<sub>2</sub>] in the media across the REEC we used O<sub>2</sub>  
339 sensor foils (PreSens Precision Sensing GmbH, Germany) -- 100  $\mu$ m thick hydrogels impregnated  
340 with particles with [O<sub>2</sub>]-dependent luminescence. The ratio of the red to blue luminescence  
341 correlates with dissolved O<sub>2</sub> concentration. The O<sub>2</sub> sensor foils were glued to the inside top  
342 surface of the REEC (made with 200  $\mu$ m thick stainless-steel washers to maintain a 100  $\mu$ m  
343 chamber height above cells) and a hole was drilled through both the glass and the foil. The  
344 response of the sensor foils to [O<sub>2</sub>] was calibrated prior to placement on cells using glucose  
345 oxidase/catalase solutions of known [O<sub>2</sub>] using the Nikon microscope with the 4X objective lens,  
346 using the TRITC and DAPI emission filters in rapid succession and exciting the foil with a 395 nm  
347 LED lamp. The [O<sub>2</sub>] in the glucose oxidase/catalase solution was measured using a Piccolo  
348 oxygen sensor system (PyroScience GmbH, Germany). To measure the [O<sub>2</sub>] dynamics across the

An *in vitro* tumorigenesis model based on live cell-generated oxygen and nutrient gradients. Gilmore, et al., 2020.

349 REEC with 4T1 cells in phenol red-free media (1 mL), images of the sensor foil were collected  
350 every 15 minutes using the 4X objective lens. A flat-field correction was applied to the images,  
351 and the red/blue intensity ratio as a function of distance from the center of the hole was  
352 converted via the calibration curve to dissolved [O<sub>2</sub>] values (Supplemental Figure 3).

353

### 354 **Extracellular hypoxia gradient dynamics in REECs via Image-iT Green Hypoxia Reagent**

355 To measure the development of gradients of intracellular hypoxia of live cells in the REECs, cells  
356 were incubated with Image-iT Green Hypoxia Reagent (IGHR) (10 μM; Invitrogen) at 37 °C for 30  
357 minutes prior to chamber placement. After chamber placement, 4T1 cells were imaged using  
358 standard FITC excitation and emission filters at 4X or 20X magnification on a Nikon Eclipse Ti  
359 widefield fluorescence microscope. For controls, IGHR treated 4T1 cells were placed in  
360 incubators set to 0.1%, 1%, or 5% O<sub>2</sub> or in a standard incubator (~20%) for 2 hours. Cells were  
361 immediately imaged (Supplemental Figure 3).

362

### 363 **Intracellular Hypoxia quantification in REECs**

364 To measure levels of intracellular hypoxia in cell disks, media in the upper chamber was  
365 replaced with complete media supplemented with pimonidazole (200 μM; Hypoxyprobe, Inc.,  
366 Massachusetts) after disk formation. In hypoxic cells, pimonidazole is reduced and forms  
367 adducts with thiol groups. After sufficient time for the pimonidazole to diffuse through the  
368 chamber and be taken up by cells (~6 hours), chambers and media were removed, and the disks  
369 were immediately fixed, blocked, and permeabilized as described above. A monoclonal  
370 antibody specific to pimonidazole adducts and conjugated with a fluorescein probe

An *in vitro* tumorigenesis model based on live cell-generated oxygen and nutrient gradients. Gilmore, et al., 2020.

371 (Hypoxyprobe-Green Kit (FITC-Mab); Hypoxyprobe, Inc.) was applied for 1 hour at room  
372 temperature, or overnight at 4 °C. Samples were rinsed three times with 1X PBS and imaged  
373 using standard FITC excitation and emission filters at 20X magnification on the Nikon Eclipse Ti  
374 widefield fluorescence microscope. For controls, cultured 4T1 cells were treated with complete  
375 media which had been supplemented with pimonidazole and deoxygenated (<1% O<sub>2</sub>) with  
376 glucose oxidase and catalase. HIF1 $\alpha$  expression was determined by immunofluorescence and  
377 correlated with pimonidazole adduct formation (Figure 1h).

378

### 379 **Glucose Gradient dynamics in REECs**

380 2 hours after chamber placement, (2-(N-(7-Nitrobenz-2-oxa-1,3-diazol-4-yl)Amino)-2-  
381 Deoxyglucose (2-NBDG) (100  $\mu$ M; ThermoFisher Scientific) with Hoechst (1  $\mu$ g/mL) in low-  
382 glucose media (5 mM glucose, 10% FBS) was diffused into the chamber for 30 minutes at 37 °C.  
383 This dye was often combined with tetramethylrhodamine, ethyl ester (TMRE) (1 nM;  
384 ThermoFisher Scientific) in order to obtain simultaneous metabolic measurements. Chambers  
385 were removed, rinsed three times in 1X PBS, and imaged using standard excitation and  
386 emission filters at 20X on the Nikon Eclipse Ti widefield fluorescence microscope. Samples  
387 could be fixed. For measurements in the disk, similar methods were used 7 days after chamber  
388 placement on a Zeiss 710 Laser Scanning Confocal Microscope with a 10X dry objective.

389

### 390 **Live/Dead Staining**

391 4-6 days after chamber placement, media was replaced with media containing the live/dead  
392 cell stains ethidium homodimer (2  $\mu$ M), calcein AM (3  $\mu$ M), and Hoechst (1  $\mu$ g/mL;

An *in vitro* tumorigenesis model based on live cell-generated oxygen and nutrient gradients. Gilmore, et al., 2020.

393 ThermoFisher) for 30 minutes. Cells were then imaged on the Nikon Eclipse Ti widefield  
394 fluorescence microscope using a live cell heated stage.

395

### 396 **Celigo Image Acquisition and Analysis**

397 Cells were cultured in 12-well plates with chambers for up to 21 days with weekly media  
398 replacement. The plate was scanned using the Cell Counting feature in the Celigo Imaging  
399 Cytometer (Nexcelom Biosciences) with the brightfield algorithm to detect cells. Cells were  
400 segmented using the built-in software.

401

### 402 **Nos2 and Cox Inhibitor treatments**

403 Immediately prior to chamber placement, the media in each well was replaced with treatment  
404 media: complete media supplemented with either the Cox inhibitor indomethacin (100  $\mu$ M) or  
405 the Nos2 inhibitor aminoguanidine (1 mM). Cells were maintained in the REECs for 3-7 days  
406 using treatment media before fixation and immunofluorescence staining. For controls, standard  
407 complete media was used.

408

### 409 **Nitric Oxide Production in REECs**

410 4-Amino-5-Methylamino-2',7'-Difluorofluorescein Diacetate (DAF) (ThermoFisher) was used to  
411 measure and spatially resolve nitric oxide (NO) production in disks. 7 days after chamber  
412 placement, wells were washed three times in 1X PBS to remove all phenol red and BSA, which  
413 interfere with DAF fluorescence. To ensure that the lower compartment of the chamber was  
414 adequately washed, the 1X PBS was gently pipetted up and down directly over the opening. The

An *in vitro* tumorigenesis model based on live cell-generated oxygen and nutrient gradients. Gilmore, et al., 2020.

415 4T1 cells were then incubated in phenol-red free, serum free media with DAF (10  $\mu$ M) and  
416 Hoechst ( $\mu$ g/mL) at 37 °C for 45 minutes. This dye was often combined with TMRE in order to  
417 obtain simultaneous measurements of mitochondrial membrane polarization state. Samples  
418 were then immediately imaged on a Zeiss 710 Laser Scanning Confocal Microscope with a 10X  
419 dry objective using standard FITC emission and excitation filters.

420

#### 421 **Metabolic Gradient Quantification in REECs**

422 Cells were incubated in phenol red free media with TMRE at 37°C for 20 minutes for cells in  
423 standard culture, or 45 minutes for cells in a REEC. TMRE was used simultaneously with 2-NBDG  
424 or DAF Diacetate. Cells were imaged with or without chamber removal, depending on the  
425 experiment. For controls, the electron transport chain was inhibited with FCCP or antimycin A  
426 and rotenone. These treatments caused the TMRE signal to decrease significantly within 15  
427 minutes. TMRE was imaged on a Zeiss 710 Laser Scanning Confocal Microscope with a 10X dry  
428 objective using Texas Red excitation and emission filters.

429

430 To confirm that mitochondrial mass was consistent across the disk, disks were then fixed,  
431 blocked, and permeabilized, as described above. The disks were stained with an ATP-synthase  
432 antibody (Abclonal, A5884, Rabbit) diluted 1:100, and incubated at 4°C overnight. Cells were  
433 rinsed and incubated with an anti-rabbit secondary at room temperature for 1 hour and then  
434 imaged on a Zeiss 710 Laser Scanning Confocal Microscope with a 10X dry objective.

435

#### 436 **Spheroid Growth, Clearing, and Imaging**



An *in vitro* tumorigenesis model based on live cell-generated oxygen and nutrient gradients. Gilmore, et al., 2020.

437 A spheroid formation assay was performed in ultra-low attachment round bottom 96 well  
438 plates (Nexcelom, Lawrence, MA, USA). 4T1 cells or 4T1-GFP-luc cells (for co-culture  
439 experiments) were plated in each well (200  $\mu$ L,  $6 \times 10^3$ /mL) with serum-free DMEM  
440 supplemented with basic Fibroblast Growth Factor (20 ng/mL) and B-27 supplement (1:50;  
441 Thermo Fisher Scientific). Media was supplemented on Day 4. Monoculture spheroids were  
442 fixed, cleared, immunolabeled with antibodies and imaged on Day 7 (see below). For coculture  
443 experiments, ANA-1 macrophages were stimulated for 18 hours followed by treatment with  
444 CellTracker Red CMTPX dye (10 $\mu$ M) at 37°C for 45 minutes and were then added to the  
445 spheroids ( $2 \times 10^5$  cells/well). The ANA-1-spheroid cocultures were fixed, cleared,  
446 immunocytochemically stained with antibodies and imaged on Day 7 (see below).  
447  
448 Spheroids were cleared for imaging using the Ce3D method<sup>30</sup>. Briefly, spheroids were fixed in  
449 4% v/v paraformaldehyde containing 0.5% Triton-X100. Spheroids were blocked at 37°C for 36  
450 hours in a humidified environment. Spheroids were then stained with directly conjugated  
451 antibodies for proteins of interest (HIF1 $\alpha$ , Nos2, Cox2) at 4 °C for 36 hours. Spheroids were  
452 stained with DAPI (300 nM) for 30 minutes and then rinsed three times with 1X PBS. The  
453 spheroids were then embedded in 1.5% low-melt agarose. Samples were placed in clearing  
454 solution (0.1% v/v Triton-X100, 13% N-methylacetamide, 66% w/v Nycodenz AG) at room  
455 temperature for 4 hours at a 1:4 agarose:clearing solution ratio. After 4 hours, the clearing  
456 solution was replaced with the equivalent volume of fresh clearing solution and left overnight.  
457

An *in vitro* tumorigenesis model based on live cell-generated oxygen and nutrient gradients. Gilmore, et al., 2020.

458 The cleared spheroids were imaged on a Leica TCS SP8 Laser Scanning Confocal microscope at  
459 20X with oil to match the index of refraction of the clearing solution (slightly higher than 1.5). Z-  
460 stacks were taken through the center of the spheroids.

461

## 462 **Image Processing and Data Analysis**

463 Images taken on the Nikon Eclipse Ti widefield fluorescence microscope were typically stitched  
464 and background corrected using a rolling ball technique in Nikon Elements software, then  
465 processed in Imaris (Bitplane). Image brightness and contrast were adjusted to optimize the  
466 visual dynamic range for display. Imaris was used for cell segmentation and to extract position,  
467 fluorescence intensity, and geometrical statistics on each cell. Custom R scripts were used to  
468 process the output of Imaris statistics, including average cell intensity for each channel and  
469 position. For cell disks, cells were binned into annuli every 50  $\mu\text{m}$  from the center, and the  
470 mean fluorescence intensity (MFI) per cell in that bin was calculated. Disks that could not be  
471 segmented were analyzed in FIJI using the Radial Profile plug-in, which averages the intensity  
472 value of all pixels at each radius from a fixed point. For the spheroid and tissue images, custom  
473 MATLAB functions were used to calculate fluorescence intensity and depth (spheroid) or  
474 position (tissue) for each pixel and averaged as above. For disks and spheroids intensity profiles,  
475 R scripts were used to average those radial mean values within 50  $\mu\text{m}$  wide annuli. For cell  
476 disks, radial values were normalized to disk radius, and MFI were normalized to the value at  $r =$   
477 0 for that disk or the control group disk. For the NBDG/TMRE data, MFI were normalized to the  
478 maximum MFI value for each profile, and the normalized curves were averaged. For spheroids,  
479 depth values were normalized to the maximum depth of each spheroid (such that 0 represents

An *in vitro* tumorigenesis model based on live cell-generated oxygen and nutrient gradients. Gilmore, et al., 2020.

480 the surface and 1 is the maximum depth), and MFI were normalized to the value at the  
481 spheroid surface. For tissue, MFI was normalized to the first position in the profile. All data are  
482 presented as mean +/- SEM unless otherwise noted. Statistical significance, determined using  
483 Welch's two-tailed t-test, and Pearson correlation coefficients were calculated in GraphPad  
484 Prism and Microsoft Excel.

## 485 Data Availability

486 The data that support the findings of this study are available from the corresponding author  
487 upon request.

## 488 Code Availability

489 The code supporting the plots and other findings in the manuscript are available from the  
490 corresponding author upon request.

## 491 References

- 492 1. Petrova, V., Annicchiarico-Petruzzelli, M., Melino, G. & Amelio, I. The hypoxic tumour  
493 microenvironment. *Oncogenesis* **7** (2018).
- 494 2. Byrne, M.B., Leslie, M.T., Gaskins, H.R. & Kenis, P.J.A. Methods to study the tumor  
495 microenvironment under controlled oxygen conditions. *Trends in Biotechnology* **32**, 556-  
496 563 (2014).
- 497 3. Keenan, T.M. & Folch, A. Biomolecular gradients in cell culture systems. *Lab on a Chip* **8**,  
498 34-57 (2007).

An *in vitro* tumorigenesis model based on live cell-generated oxygen and nutrient gradients. Gilmore, et al., 2020.

- 499 4. Friedrich, J., Seidel, C., Ebner, R. & Kunz-Schughart, L.A. Spheroid-based drug screen:  
500 Considerations and practical approach. *Nature Protocols* (2009).
- 501 5. Nath, S. & Devi, G.R. Three-dimensional culture systems in cancer research: Focus on  
502 tumor spheroid model. *Pharmacology and Therapeutics* **163**, 94-108 (2016).
- 503 6. Hoh, J.H., Werbin, J.L. & Heinz, W.F. Restricted exchange microenvironments for cell  
504 culture. *BioTechniques* **64**, 1-6 (2018).
- 505 7. Pulaski, B.A. & Ostrand-Rosenberg, S. Mouse 4T1 Breast Tumor Model. *Current*  
506 *Protocols in Immunology* **39**, 20.22.21-20.22.16 (2000).
- 507 8. Noy, R. & Pollard, Jeffrey W. Tumor-Associated Macrophages: From Mechanisms to  
508 Therapy. *Immunity* **41**, 49-61 (2014).
- 509 9. Lehmann, S. et al. Hypoxia Induces a HIF-1-Dependent Transition from Collective-to-  
510 Amoeboid Dissemination in Epithelial Cancer Cells. *Current Biology* (2017).
- 511 10. Nieto, M.A., Huang, R.Y.-j., Jackson, R.A. & Thiery, J.P. Review EMT : 2016. *Cell* **166**, 21-  
512 45 (2016).
- 513 11. Basudhar, D. et al. Coexpression of NOS2 and COX2 accelerates tumor growth and  
514 reduces survival in estrogen receptor-negative breast cancer. *Proceedings of the*  
515 *National Academy of Sciences* **114**, 13030-13035 (2017).
- 516 12. Somasundaram, V. et al. Molecular Mechanisms of Nitric Oxide in Cancer Progression,  
517 Signal Transduction, and Metabolism. *Antioxidants & Redox Signaling* **30**, 1124-1143  
518 (2018).
- 519 13. Heinecke, J.L. et al. Tumor microenvironment-based feed-forward regulation of NOS2 in  
520 breast cancer progression. *Proc Natl Acad Sci U S A* **111**, 6323-6328 (2014).

An *in vitro* tumorigenesis model based on live cell-generated oxygen and nutrient gradients. Gilmore, et al., 2020.

- 521 14. Basudhar, D. et al. Understanding the tumour micro-environment communication  
522 network from an NOS2/COX2 perspective. *Br J Pharmacol* **176**, 155-176 (2019).
- 523 15. Somasundaram, V. et al. Inducible nitric oxide synthase-derived extracellular nitric oxide  
524 flux regulates proinflammatory responses at the single cell level. *Redox Biology* **28**,  
525 101354 (2020).
- 526 16. Olson, N. & Van Der Vliet, A. Interactions between nitric oxide and hypoxia-inducible  
527 factor signaling pathways in inflammatory disease. *Nitric Oxide - Biology and Chemistry*  
528 **25**, 125-137 (2011).
- 529 17. Cyr, A. et al. Endotoxin Engages Mitochondrial Quality Control via an iNOS-Reactive  
530 Oxygen Species Signaling Pathway in Hepatocytes. *Oxid Med Cell Longev* **2019**, 4745067  
531 (2019).
- 532 18. Vitale, I., Manic, G., Coussens, L.M., Kroemer, G. & Galluzzi, L. Macrophages and  
533 Metabolism in the Tumor Microenvironment. *Cell Metab* **30**, 36-50 (2019).
- 534 19. Jeong, S.K. et al. Tumor associated macrophages provide the survival resistance of  
535 tumor cells to hypoxic microenvironmental condition through IL-6 receptor-mediated  
536 signals. *Immunobiology* **222**, 55-65 (2017).
- 537 20. Oyler-Yaniv, A. et al. A Tunable Diffusion-Consumption Mechanism of Cytokine  
538 Propagation Enables Plasticity in Cell-to-Cell Communication in the Immune System.  
539 *Immunity* **46**, 609-620 (2017).
- 540 21. Pettersen, E.O., Larsen, L.H., Ramsing, N.B. & Ebbesen, P. Pericellular oxygen depletion  
541 during ordinary tissue culturing measured with oxygen microsensors. *Cell Proliferation*  
542 **38**, 257-267 (2005).

An *in vitro* tumorigenesis model based on live cell-generated oxygen and nutrient gradients. Gilmore, et al., 2020.

- 543 22. Suhaimi, H., Wang, S. & Das, D.B. Glucose diffusivity in cell culture medium. *Chemical*  
544 *Engineering Journal* **269**, 323-327 (2015).
- 545 23. Simões, R.V. et al. Metabolic Plasticity of Metastatic Breast Cancer Cells: Adaptation to  
546 Changes in the Microenvironment. *Neoplasia* **17**, 671-684 (2015).
- 547 24. Wenger, R., Kurtcuoglu, V., Scholz, C., Marti, H. & Hoogewijs, D. Frequently asked  
548 questions in hypoxia research. *Hypoxia* **3**, 35 (2015).
- 549 25. Al-Ani, A. et al. Oxygenation in cell culture: Critical parameters for reproducibility are  
550 routinely not reported. *PLoS One* **13**, e0204269 (2018).
- 551 26. Gerdes, M.J. et al. Highly multiplexed single-cell analysis of formalin-fixed, paraffin-  
552 embedded cancer tissue. *Proceedings of the National Academy of Sciences* **110**, 11982-  
553 11987 (2013).
- 554 27. Lin, J.R., Fallahi-Sichani, M., Chen, J.Y. & Sorger, P.K. Cyclic Immunofluorescence (CyclIF),  
555 A Highly Multiplexed Method for Single-cell Imaging. *Current protocols in chemical*  
556 *biology* **8**, 251-264 (2016).
- 557 28. Blasi, E., Radzioch, D., Durum, S.K. & Varesio, L. A murine macrophage cell line,  
558 immortalized by v-raf and v-myc oncogenes, exhibits normal macrophage functions. *Eur*  
559 *J Immunol* **17**, 1491-1498 (1987).
- 560 29. Blasi, E. et al. Selective immortalization of murine macrophages from fresh bone  
561 marrow by a raf/myc recombinant murine retrovirus. *Nature* **318**, 667-670 (1985).
- 562 30. Li, W., Germain, R.N. & Gerner, M.Y. Multiplex , quantitative cellular analysis in large  
563 tissue volumes with clearing-enhanced 3D microscopy ( C e 3D ). *Proceedings of the*  
564 *National Academy of Sciences* (2017).

An *in vitro* tumorigenesis model based on live cell-generated oxygen and nutrient gradients. Gilmore, et al., 2020.

## 565 Acknowledgments

566 This project has been funded in whole or in part with Federal funds from the National Cancer  
567 Institute, National Institutes of Health, under Contract No. 75N91019D00024 and by the  
568 Intramural Program of the NIH, NCI, Center for Cancer Research. The content of this publication  
569 does not necessarily reflect the views or policies of the Department of Health and Human  
570 Services, nor does mention of trade names, commercial products, or organizations imply  
571 endorsement by the U.S. Government. NCI-Frederick is accredited by AAALAC International  
572 and follows the Public Health Service Policy for the Care and Use of Laboratory Animals. Animal  
573 care was provided in accordance with the procedures outlined in the “Guide for Care and Use  
574 of Laboratory Animals” (National Research Council; 2011; National Academy Press; Washington,  
575 D.C.). In addition, we would like to thank Dan McVicar for the generous use of his Seahorse XF  
576 Analyzer.

## 577 Author contributions

578 WFH, SJL, and DAW conceived the project, and ACG, SJF, VS, and WFH designed the  
579 experiments. ACG and SJF constructed the REECs, performed all experiments with the  
580 chambers, wrote analysis software, and processed and analyzed the images. VS grew the  
581 spheroids and performed the mouse experiments and assisted ACG with the Seahorse  
582 measurements. ACG imaged the spheroids and tissue samples. DAS assisted with multiplexed  
583 immunofluorescence imaging and image analysis. WFH implemented the mathematical model.  
584 ACG, SJF, and WFH wrote the manuscript, and all authors critically reviewed the manuscript.

## 585 Ethics declarations

### 586 **Competing interests**

587 The authors declare no competing interests
